# Supplementary material
Source: PubMed Central journal article supplement (PMC3351830)
Supplement: supp_D025270_jlr.D025270-1.pdf [file supp_D025270_jlr.D025270-1.pdf]

## Supplementary data

**Supplementary Figure 1. Representative mass spectra of OxPLs generated by oxidation of a single molecular species of PC.** PAPC ( $m/z$  782) and PLPC ( $m/z$  758) were oxidized by exposure of dry lipids to air and analyzed by mass spectrometry in positive mode using flow injection. The data illustrate that non-enzymatic oxidation of a single PC produces dozens of oxidized species. Note that  $m/z$  values of all major oxidized products present in these spectra are monitored by the HPLC-MS/MS method.

**Supplementary Figure 2. OxPCs elute from reversed-phase column significantly earlier than the bulk of unoxidized PCs.** The total ion current chromatogram shows the sum of intensities of 99  $m/z$  values monitored at every time point during elution from the column. Air-oxidized pure PCs were used to estimate the time window when oxidized species were eluted. In addition to fibroblast extract, lipid extracts of mouse lung and liver were taken as representative samples obtained in experiments in vivo (generous gift of Dr. Konstantin Birukov, Univ. of Chicago). Based on these data, OxPCs were quantified in further experiments within 8 minutes (dashed line).

**Supplementary Figure 3. Variability of patterns of OxPLs in different biological samples.** OxPCs were detected by HPLC-MS/MS in LLE-purified lipid extracts from sham-treated (control) fibroblasts (left column) or lungs of untreated mice (right column, generous gift of Dr. Konstantin Birukov, Univ. of Chicago). Selected  $m/z$  values are shown to illustrate significant differences between the samples in relative abundances of isobaric peaks.

**Supplementary Figure 4. Identification of selected endogenous OxPCs by tandem mass spectrometry in negative mode.** Commercial standards or lipid extracts from UVA-irradiated human dermal fibroblasts were analyzed in positive or negative mode using transitions characteristic of each OxPC.

**Supplementary Table 1.****Extraction efficiency of the LLE procedure.**

Samples of lipids extracted from fibroblasts by methanol/acetic acid (3%)/BHT (0.01%) (lipid amount equivalent of two wells in a 6-well dish) were spiked with POVPC, PGPC, PONPC and PAzPC (50 ng each) either before or after the LLE procedure. Lipid extract without added standards was used for determination of endogenous levels of these PCs; endogenous values were subtracted from the levels obtained for spiked samples. The yield was expressed as the ratio of analytes in samples spiked before the LLE to those spiked after. In half of the samples precipitated protein was removed from the methanolic extract by centrifugation (10' at 12000 g) prior to hexane/BHT (0.01%) extraction.

| Analyte      | Extraction yield, % $\pm$ SD            |                                                           |
|--------------|-----------------------------------------|-----------------------------------------------------------|
|              | In the presence of precipitated protein | Precipitated protein removed by centrifugation before LLE |
| <b>DNPC</b>  | 89.0 $\pm$ 1.8                          | 88.7 $\pm$ 3.7                                            |
| <b>POVPC</b> | 66.7 $\pm$ 9.5                          | 70.2 $\pm$ 5.0                                            |
| <b>PGPC</b>  | 88.1 $\pm$ 3.6                          | 88.7 $\pm$ 2.9                                            |
| <b>PONPC</b> | 61.5 $\pm$ 11.4                         | 65.9 $\pm$ 6.8                                            |
| <b>PAzPC</b> | 88.6 $\pm$ 2.1                          | 87.1 $\pm$ 2.5                                            |

**Supplementary Table 2. Analytical parameters for quantification of OxPLs.** Internal standard (DNPC, 3.1 pmol) was applied on the column together with increasing amounts of calibrants. The lowest calibrant has a signal-to-noise ratio  $\geq$  6 for each analyte. Calibrants having signal heights  $>$   $3.5 \times 10^6$  cps were not considered for calibration due to non-linear detector response. Acceptance range for back-calculated accuracy of calibrants was 80-120%. Equation for calculation was obtained using 1/x weighted linear regression.

| Phospholipid | Equation for calculation | Linear range, pmol on column (number of calibrants) | r value |
|--------------|--------------------------|-----------------------------------------------------|---------|
| <b>POVPC</b> | $y = 0.0575x + 0.00147$  | 0.08-80 ( $n = 11$ )                                | 0.9981  |
| <b>PGPC</b>  | $y = 0.566x - 0.0000465$ | 0.08-10 ( $n = 8$ )                                 | 0.9996  |
| <b>PONPC</b> | $y = 0.279x + 0.000801$  | 0.08-80 ( $n = 11$ )                                | 0.9991  |
| <b>PAzPC</b> | $y = 0.65x + 0.00249$    | 0.08-10 ( $n = 8$ )                                 | 0.9997  |

### Supplementary Table 3

#### A list of *m/z* values monitored by the procedure.

*m/z* values were calculated based on the structures of known and predicted oxidized molecular species generated from PAPC, PLPC, SAPC and SLPC. In addition, a few major fragmented species generated from PDHPC, as well as lysoPCs and internal standards are included. The right column contains selected references to publications describing the presence of corresponding OxPC species in cells and tissues. Four molecular species produced in vivo (POVPC, PGPC, PONPC and PAzPC) were unequivocally identified using commercial standards and tandem mass-spectrometry in negative ion mode. Note that identification of peaks for which no commercial standards were available was beyond the scope of this work.

| <i>m/z</i> | Compatible structures (precursor)                                                                              | Number of isobaric peaks detected in this study | Selected publications showing the presence of these compounds in vitro or in vivo |
|------------|----------------------------------------------------------------------------------------------------------------|-------------------------------------------------|-----------------------------------------------------------------------------------|
| 482        | 15:0-Lyso-PC, di-7:0-PC                                                                                        | 2                                               |                                                                                   |
| 496        | 16:0-Lyso-PC                                                                                                   | 2                                               |                                                                                   |
| 518        | 18:3-Lyso-PC                                                                                                   | 1                                               |                                                                                   |
| 520        | 18:2-Lyso-PC                                                                                                   | 2                                               |                                                                                   |
| 522        | 18:1-Lyso-PC                                                                                                   | 2                                               |                                                                                   |
| 524        | 18:0-Lyso-PC                                                                                                   | 2                                               |                                                                                   |
| 538        | di-9:0-PC (external standard)                                                                                  | 2                                               |                                                                                   |
| 580        | 4-oxo-butyryl-PPC (PDHPC)                                                                                      | 3                                               | (1, 2)                                                                            |
| 594        | POVPC (PAPC)                                                                                                   | 6                                               | (2-10)                                                                            |
| 596        | Succinoyl-PPC (PDHPC)                                                                                          | 4                                               | (1, 2)                                                                            |
| 610        | PGPC (PAPC)                                                                                                    | 6                                               | (4, 5, 7, 10, 11)                                                                 |
| 622        | SOVPC (SAPC)<br>7-oxo-heptanoyl-PPC (PLPC)<br>4-hexenedioyl-PPC (PAPC)                                         | 8                                               | (3, 4, 7, 12)                                                                     |
| 632        | Furylbutanoyl-PPC (PAPC)                                                                                       | 5                                               | (13)                                                                              |
| 634        | KOHA-PC (PDHPC)                                                                                                | 5                                               | (13)                                                                              |
| 636        | 8-oxo-octanoyl-PPC (PLPC)<br>4-OH-7-oxo-5-heptenoyl-PPC (PAPC)<br>5-heptenedioyl-PPC (PAPC)<br>HOHA-PC (PDHPC) | 2                                               | (3, 10, 12, 13)                                                                   |
| 638        | SGPC (SAPC)                                                                                                    | 4                                               | (4, 7)                                                                            |
| 640        | Acetal-POVPC                                                                                                   | 1                                               |                                                                                   |
| 648        | KOOA-PPC (PAPC)<br>4-OOH-5-oxo-pentanoyl-PPC (PAPC)                                                            | 5                                               | (3, 6, 12, 13)                                                                    |

|     |                                                                                                                 |    |                    |
|-----|-----------------------------------------------------------------------------------------------------------------|----|--------------------|
| 650 | 6-octenedioyl-PPC (PAPC)<br>PONPC (PLPC)<br>HOOA-PPC (PAPC)<br>KHdiA-PC (PDHPC)<br>7-OH-5-heptaenoyl-SPC (SAPC) | 6  | (1-6, 10, 12, 13)  |
| 660 | 10-oxo-6,8-decedienoyl-PPC (PAPC)<br>Furylbutanoyl-SPC (SAPC)                                                   | 3  | (10, 12)           |
| 664 | KOdiA-PPC (PAPC)                                                                                                | 5  | (3, 5, 6, 10)      |
| 666 | HOdiA-PPC (PAPC)<br>PAzPC (PLPC)                                                                                | 7  | (3-6, 10-12)       |
| 676 | KOOA-SPC (SAPC)<br>11-oxo-9-undecenoyl-PPC (PLPC)                                                               | 3  | (12)               |
| 678 | HOOA-SPC (SAPC)<br>SONPC (SLPC)                                                                                 | 6  | (4)                |
| 682 | Unknown                                                                                                         | 6  |                    |
| 688 | Furyloctanoyl-PPC (PLPC)                                                                                        | 7  | (13)               |
| 692 | KOdiA-SPC (SAPC)<br>8-OH-11-oxo-9-undecenoyl-PPC (PLPC)                                                         | 10 | (12)               |
| 694 | HOdiA-SPC (SAPC)<br>SAzPC (SLPC)                                                                                | 10 | (4)                |
| 696 | Acetal-PONPC (PLPC)                                                                                             | 11 |                    |
| 704 | KODA-PPC (PLPC)<br>8-OOH-9-oxo-nonanoyl-PPC (PLPC)                                                              | 8  | (5, 6, 10, 12, 13) |
| 706 | HODA-PPC (PLPC)<br>9-OH-12-oxo-10-dodecenoyl-PPC (PLPC)                                                         | 9  | (5, 6, 12, 13)     |
| 710 | 12-oxo-8,10-dodecendienoyl-PPC (PLPC)                                                                           | 4  | (12)               |
| 716 | Furyloctanoyl-SPC (SLPC)                                                                                        | 4  |                    |
| 720 | KDdiA-PPC (PLPC)                                                                                                | 5  | (5, 6, 10, 12)     |
| 722 | 5,10-diOH-6,8-undecedienedioic-PPC (PAPC)<br>HDdiA-PPC (PLPC)                                                   | 3  | (5, 6, 10, 12)     |
| 724 | Acetal-SONPC                                                                                                    | 4  |                    |
| 732 | 10-OH-5,8,11-tridecatrienoyl-PPC (PAPC)<br>8-oxo-9,11-tridecedienedioyl-PPC (PLPC)                              | 3  | (10, 12)           |
| 734 | HODA-SPC (SLPC)                                                                                                 | 5  |                    |

|     |                                                                                        |   |                   |
|-----|----------------------------------------------------------------------------------------|---|-------------------|
| 748 | KDiA-SPC (SLPC)                                                                        | 2 |                   |
| 750 | 5,10-diOH-6,8-undecadienedioic-PPC<br>(SAPC)<br>HDiA-SPC (SLPC)                        | 1 | (10)              |
| 758 | PLPC (only isobaric peaks eluting within 8 minutes; PLPC elutes later)                 | 5 |                   |
| 760 | 10-OH-5,8,11-tridecatrienoyl-PPC<br>(SAPC)                                             | 6 |                   |
| 772 | PLPC-keto (PLPC)                                                                       | 2 | (3, 10, 14, 15)   |
| 774 | PLPC-OH (PLPC)<br>PLPC-epoxy (PLPC)                                                    | 2 | (3, 4, 10, 14-16) |
| 782 | PAPC (only isobaric peaks eluting within 8 minutes; PAPC elutes later)                 | 4 |                   |
| 786 | SLPC (only isobaric peaks eluting within 8 minutes; SLPC elutes later)                 | 3 |                   |
| 788 | PLPC-epoxy,keto<br>PLPC-OH,keto                                                        | 3 | (3, 15)           |
| 790 | PLPC-OOH<br>PLPC-diOH<br>PLPC-OH,epoxy                                                 | 4 | (3, 4, 10, 15-17) |
| 794 | 15-deoxy- $\Delta^{12,14}$ -isoPGJ2-PPC (PAPC)                                         | 6 | (18)              |
| 796 | PAPC-keto                                                                              | 4 |                   |
| 798 | PAPC-OH<br>PAPC-epoxy                                                                  | 4 | (4, 10, 14, 19)   |
| 800 | SLPC-keto                                                                              | 2 | (3, 14)           |
| 802 | SLPC-OH<br>SLPC-epoxy                                                                  | 1 | (3, 4, 14)        |
| 804 | PLPC-OOH,keto<br>PLPC-diOH,keto                                                        | 4 | (3, 15)           |
| 806 | PLPC-OOH,OH                                                                            | 5 | (10)              |
| 808 | PLPC-diOH,epoxy<br>PLPC-triOH                                                          | 8 | (10, 14, 15)      |
| 810 | PECPC (PAPC)<br>SAPC (only isobaric peaks eluting within 8 minutes; SAPC elutes later) | 4 | (8)               |
| 812 | isoPG(A2,J2)-PPC                                                                       | 6 | (20, 21)          |
| 814 | PAPC-OOH                                                                               | 4 | (3, 4, 10)        |

|     |                                                                                                                      |   |                     |
|-----|----------------------------------------------------------------------------------------------------------------------|---|---------------------|
|     | PAPC-diOH<br>PAPC-OH,epoxy                                                                                           |   |                     |
| 816 | SLPC-epoxy,keto                                                                                                      | 6 | (3)                 |
| 818 | SLPC-OOH<br>SLPC-diOH<br>SLPC-OH,epoxy                                                                               | 5 | (3, 4)              |
| 820 | 2,3-dinor-isoTxB2-PPC (PAPC)<br>PLPC-OOH,OH,keto<br>PLPC-OOH,epoxy                                                   | 5 | (15)                |
| 822 | 15-deoxy- $\Delta^{12,14}$ -isoPGJ2-PPC (SAPC)<br>PLPC-diOOH<br>PLPC-OOH,diOH<br>PLPC-triOH,keto<br>PLPC-triOH,epoxy | 4 | (15, 18)            |
| 824 | SAPC-keto<br>PLPC-tetraOH                                                                                            | 2 | (10, 15, 19)        |
| 826 | SAPC-OH<br>SAPC-epoxy                                                                                                | 4 | (4, 22)             |
| 828 | PEIPC (PAPC)<br>PAPC-OOH,keto                                                                                        | 7 | (3, 7-9, 23)        |
| 830 | isoPG(E2,I2,D2)-PPC (PAPC)<br>isoLG(E2,D2)-PPC (PAPC)<br>PAPC-OOH,OH                                                 | 6 | (3, 20, 21, 24, 25) |
| 832 | isoPGF2 $\alpha$ -PPC<br>SLPC-OOH,keto                                                                               | 7 | (26)                |
| 834 | SLPC-OOH,OH                                                                                                          | 8 |                     |
| 836 | SLPC-triOH                                                                                                           | 8 | (14, 15)            |
| 838 | SECPC                                                                                                                | 6 | (7)                 |
| 840 | isoPG(A2,J2)-SPC (SAPC)<br>SAPC-epoxy,keto<br>SAPC-OH,keto                                                           | 5 | (20, 21)            |
| 842 | SAPC-OOH<br>SAPC-diOH<br>SAPC-OH,epoxy                                                                               | 5 | (3, 4)              |
| 844 | PAPC-OOH,OH,keto<br>PAPC-OOH,epoxy,keto                                                                              | 8 | (3, 10)             |
| 846 | PAPC-diOOH                                                                                                           | 9 | (3, 10)             |

|     |                                                                             |    |                     |
|-----|-----------------------------------------------------------------------------|----|---------------------|
|     | PAPC-OOH,diOH                                                               |    |                     |
| 848 | Isofuran-PPC (PAPC)<br>iso-TxB2-PPC (PAPC)                                  | 7  | (3, 27-29)          |
| 850 | SLPC-diOOH,epoxy<br>SLPC-OOH,diOH<br>SLPC-triOH,keto<br>SLPC-triOH,epoxy    | 8  |                     |
| 852 | SLPC-OOH,OH,keto<br>SLPC-tetraOH                                            | 7  |                     |
| 856 | SEIPC (SAPC)<br>SAPC-OOH,keto                                               | 7  | (7)                 |
| 858 | isoPG(E2,I2,D2)-SPC (SAPC)<br>isoLG(E2,D2)-SPC (SAPC)<br>SAPC-OOH,OH (SAPC) | 7  | (3, 20, 21, 24, 25) |
| 860 | isoPGF2 $\alpha$ -SPC<br>PAPC-OOH,OH,epoxy                                  | 7  | (3)                 |
| 862 | PAPC-diOOH,OH                                                               | 9  | (10)                |
| 864 | SLPC-diOOH,keto,epoxy                                                       | 8  |                     |
| 866 | SLPC-diOOH,OH,epoxy                                                         | 8  |                     |
| 870 | SAPC-OOH,diketo                                                             | 10 |                     |
| 872 | SAPC-OOH,OH,keto<br>SAPC-OOH,keto,epoxy                                     | 8  |                     |
| 874 | SAPC-diOOH                                                                  | 8  |                     |
| 876 | Isofuran-PPC (SAPC)<br>Iso-TxB2-SPC (SAPC)                                  | 5  | (27-29)             |
| 878 | PAPC-triOOH                                                                 | 6  | (10)                |
| 882 | SLPC-triOOH                                                                 | 7  |                     |
| 888 | SAPC-OOH,OH,epoxy                                                           | 3  |                     |
| 890 | SAPC-diOOH,OH                                                               | 6  |                     |
| 894 | PAPC-triOOH,OH                                                              | 3  | (10)                |
| 906 | SAPC-triOOH                                                                 | 5  |                     |
| 922 | SAPC-triOOH,OH                                                              | 4  |                     |

### Supplementary References

1. Gu, X., M. Sun, B. Gugiu, S. Hazen, J. W. Crabb, and R. G. Salomon. 2003. Oxidatively truncated docosahexaenoate phospholipids: total synthesis, generation, and peptide adduction chemistry, *J. Org. Chem.* **68**: 3749-3761.
2. Sun, M., S. C. Finnemann, M. Febbraio, L. Shan, S. P. Annangudi, E. A. Podrez, G. Hoppe, R. Darrow, D. T. Organisciak, R. G. Salomon, R. L. Silverstein, and S. L. Hazen. 2006. Light-induced oxidation of photoreceptor outer segment phospholipids generates ligands for CD36-mediated phagocytosis by retinal pigment epithelium: a potential mechanism for modulating outer segment phagocytosis under oxidant stress conditions, *J. Biol. Chem.* **281**: 4222-4230.
3. Davis, B., G. Koster, L. J. Douet, M. Scigelova, G. Woffendin, J. M. Ward, A. Smith, J. Humphries, K. G. Burnand, C. H. Macphee, and A. D. Postle. 2008. Electrospray ionization mass spectrometry identifies substrates and products of lipoprotein-associated phospholipase A2 in oxidized human low density lipoprotein, *J. Biol. Chem.* **283**: 6428-6437.
4. Nakanishi, H., Y. Iida, T. Shimizu, and R. Taguchi. 2009. Analysis of oxidized phosphatidylcholines as markers for oxidative stress, using multiple reaction monitoring with theoretically expanded data sets with reversed-phase liquid chromatography/tandem mass spectrometry, *J. Chromatogr. B Analyt. Technol. Biomed. Life Sci.* **877**: 1366-1374.
5. Podrez, E. A., E. Poliakov, Z. Shen, R. Zhang, Y. Deng, M. Sun, P. J. Finton, L. Shan, M. Febbraio, D. P. Hajjar, R. L. Silverstein, H. F. Hoff, R. G. Salomon, and S. L. Hazen. 2002. A novel family of atherogenic oxidized phospholipids promotes macrophage foam cell formation via the scavenger receptor CD36 and is enriched in atherosclerotic lesions, *J. Biol. Chem.* **277**: 38517-38523.
6. Podrez, E. A., T. V. Byzova, M. Febbraio, R. G. Salomon, Y. Ma, M. Valiyaveetil, E. Poliakov, M. Sun, P. J. Finton, B. R. Curtis, J. Chen, R. Zhang, R. L. Silverstein, S. L. Hazen



2007. Platelet CD36 links hyperlipidemia, oxidant stress and a prothrombotic phenotype, *Nat. Med.* **13**: 1086-1095.
7. Subbanagounder, G., N. Leitinger, D. C. Schwenke, J. W. Wong, H. Lee, C. Rizza, A. D. Watson, K. F. Faull, A. M. Fogelman, and J. A. Berliner. 2000. Determinants of bioactivity of oxidized phospholipids. Specific oxidized fatty acyl groups at the sn-2 position, *Arterioscler. Thromb. Vasc. Biol.* **20**: 2248-2254.
  8. Subbanagounder, G., J. W. Wong, H. Lee, K. F. Faull, E. Miller, J. L. Witztum, and J. A. Berliner. 2002. Epoxyisoprostane and epoxycyclopentenone phospholipids regulate monocyte chemotactic protein-1 and interleukin-8 synthesis. Formation of these oxidized phospholipids in response to interleukin-1beta, *J. Biol. Chem.* **277**: 7271-7281.
  9. Watson, A. D., N. Leitinger, M. Navab, K. F. Faull, S. Horkko, J. L. Witztum, W. Palinski, D. Schwenke, R. G. Salomon, W. Sha, G. Subbanagounder, A. M. Fogelman, and J. A. Berliner. 1997. Structural identification by mass spectrometry of oxidized phospholipids in minimally oxidized low density lipoprotein that induce monocyte/endothelial interactions and evidence for their presence in vivo, *J. Biol. Chem.* **272**: 13597-13607.
  10. Reis, A., M. R. Domingues, F. M. Amado, A. J. Ferrer-Correia, and P. Domingues. 2005. Separation of peroxidation products of diacyl-phosphatidylcholines by reversed-phase liquid chromatography-mass spectrometry, *Biomed. Chromatogr.* **19**: 129-137.
  11. Yang, L., C. Latchoumycandane, M. R. McMullen, B. T. Pratt, R. Zhang, B. G. Papouchado, L. E. Nagy, A. E. Feldstein, and T. M. McIntyre. 2010. Chronic alcohol exposure increases circulating bioactive oxidized phospholipids, *J. Biol. Chem.* **285**: 22211-22220.
  12. Reis, A., P. Domingues, A. J. Ferrer-Correia, and M. R. Domingues. 2004. Fragmentation study of short-chain products derived from oxidation of diacylphosphatidylcholines by electrospray tandem mass spectrometry: identification of novel short-chain products. *Rapid Commun, Mass Spectrom.* **18**: 2849-2858.

13. Gao, S., R. Zhang, M. E. Greenberg, M. Sun, X. Chen, B. S. Levison, R. G. Salomon, and S. L. Hazen. 2006. Phospholipid hydroxyalkenals, a subset of recently discovered endogenous CD36 ligands, spontaneously generate novel furan-containing phospholipids lacking CD36 binding activity in vivo, *J. Biol. Chem.* **281**: 31298-31308.
14. Adachi, J., N. Yoshioka, M. Sato, K. Nakagawa, Y. Yamamoto, and Y. Ueno. 2005. Detection of phosphatidylcholine oxidation products in rat heart using quadrupole time-of-flight mass spectrometry, *J. Chromatogr. B Analyt. Technol. Biomed. Life Sci.* **823**: 37-43.
15. Reis, A., M. R. Domingues, F. M. Amado, A. J. Ferrer-Correia, and P. Domingues. 2007. Radical peroxidation of palmitoyl-linoleoyl-glycerophosphocholine liposomes: Identification of long-chain oxidised products by liquid chromatography-tandem mass spectrometry. *J. Chromatogr. B Analyt. Technol. Biomed. Life Sci.* **855**: 186-199.
16. Sun, M. and R. G. Salomon. 2004. Oxidative fragmentation of hydroxy octadecadienoates generates biologically active gamma-hydroxyalkenals, *J. Am. Chem. Soc.* **126**: 5699-5708.
17. Ibusuki, D., K. Nakagawa, A. Asai, S. Oikawa, Y. Masuda, T. Suzuki, and T. Miyazawa. 2008. Preparation of pure lipid hydroperoxides, *J. Lipid Res.* **49**: 2668-2677.
18. Hardy, K. D., B. E. Cox, G. L. Milne, H. Yin, and L. J. Roberts. 2011. Nonenzymatic free radical-catalyzed generation of 15-deoxy-Delta(12,14)-prostaglandin J-like compounds (deoxy-J-isoprostanes) in vivo, *J. Lipid Res.* **52**: 113-124.
19. Feldstein, A. E., R. Lopez, T. A. Tamimi, L. Yerian, Y. M. Chung, M. Berk, R. Zhang, T. M. McIntyre, and S. L. Hazen. 2010. Mass spectrometric profiling of oxidized lipid products in human nonalcoholic fatty liver disease and nonalcoholic steatohepatitis, *J. Lipid Res.* **51**: 3046-3054.
20. Chen, Y., W. E. Zackert, L. J. Roberts, and J. D. Morrow. 1999. Evidence for the formation of a novel cyclopentenone isoprostane, 15-A2t-isoprostane (8-iso-prostaglandin A2) in vivo, *Biochim. Biophys. Acta* **1436**: 550-556.

21. Chen, Y., J. D. Morrow, and L. J. Roberts. 1999. Formation of reactive cyclopentenone compounds in vivo as products of the isoprostane pathway, *J. Biol. Chem.* **274**: 10863-10868.
22. Yin, H., B. E. Cox, W. Liu, N. A. Porter, J. D. Morrow, and G. L. Milne. 2009. Identification of intact oxidation products of glycerophospholipids in vitro and in vivo using negative ion electrospray iontrap mass spectrometry, *J. Mass Spectrom.* **44**: 672-680.
23. Gruber, F., O. Oskolkova, A. Leitner, M. Mildner, V. Mlitz, B. Lengauer, A. Kadl, P. Mrass, G. Kronke, B. R. Binder, V. N. Bochkov, N. Leitinger, and E. Tschachler. 2007. Photooxidation generates biologically active phospholipids that induce heme oxygenase-1 in skin cells, *J. Biol. Chem.* **282**: 16934-16941.
24. Brame, C. J., R. G. Salomon, J. D. Morrow, and L. J. Roberts. 1999. Identification of extremely reactive gamma-ketoaldehydes (isolevuglandins) as products of the isoprostane pathway and characterization of their lysyl protein adducts, *J. Biol. Chem.* **274**: 13139-13146.
25. Brose, S. A., B. T. Thuen, and M. Y. Golovko. 2011. LC/MS/MS method for analysis of E series prostaglandins and isoprostanes, *J. Lipid Res.* **52**: 850-859.
26. Morrow, J. D., J. A. Awad, H. J. Boss, I. A. Blair, and L. J. Roberts. 1992. Non-cyclooxygenase-derived prostanoids (F2-isoprostanes) are formed in situ on phospholipids, *Proc. Natl. Acad. Sci. U.S.A* **89**: 10721-10725.
27. Fessel, J. P., N. A. Porter, K. P. Moore, J. R. Sheller, and L. J. Roberts. 2002. Discovery of lipid peroxidation products formed in vivo with a substituted tetrahydrofuran ring (isofurans) that are favored by increased oxygen tension, *Proc. Natl. Acad. Sci. U.S.A* **99**:16713-16718.
28. Fessel, J. P., C. Hulette, S. Powell, L. J. Roberts, and J. Zhang. 2003. Isofurans, but not F2-isoprostanes, are increased in the substantia nigra of patients with Parkinson's disease and with dementia with Lewy body disease, *J. Neurochem.* **85**: 645-650.

29. Morrow, J. D., J. A. Awad, A. Wu, W. E. Zackert, V. C. Daniel, and L. J. Roberts. 1996. Nonenzymatic free radical-catalyzed generation of thromboxane-like compounds (isothromboxanes) in vivo, *J. Biol. Chem.* **271**: 23185-23190.
