# Supplementary material
Source: PubMed Central journal article supplement (PMC3351830)

Supplementary Figure 1.

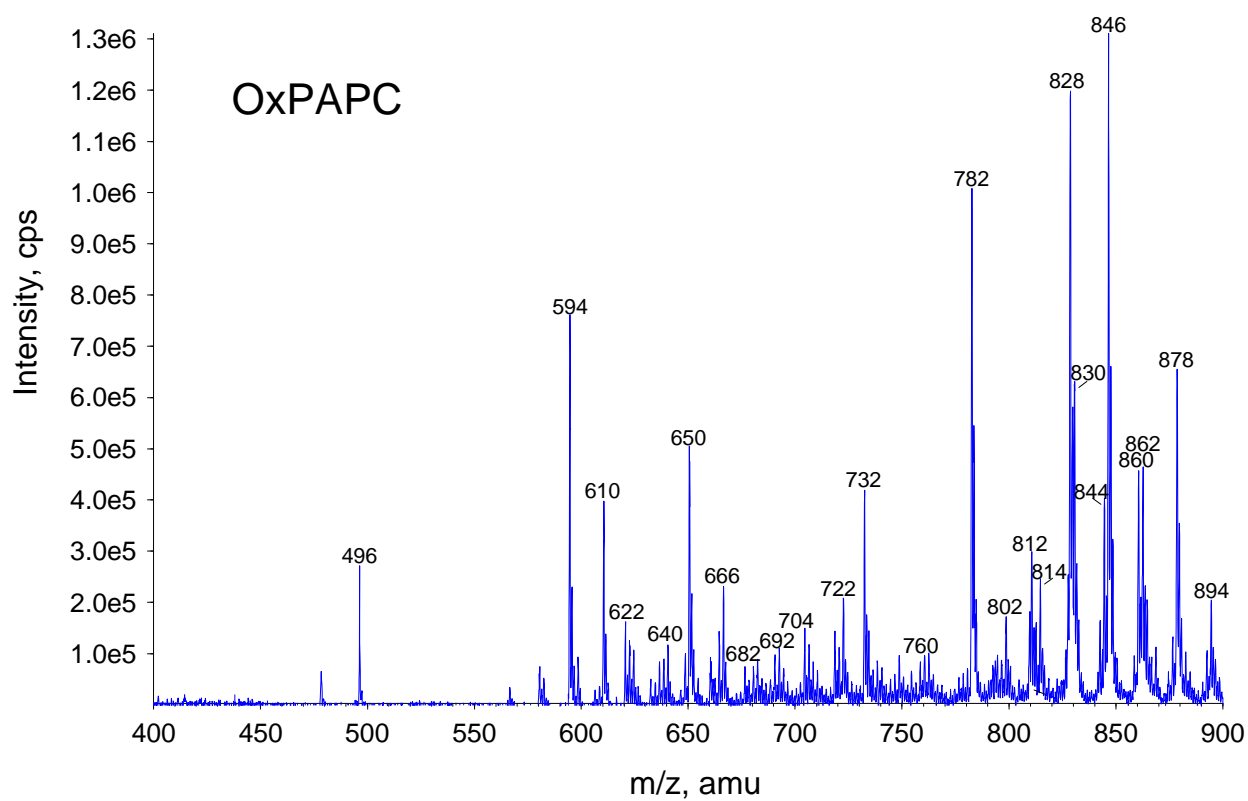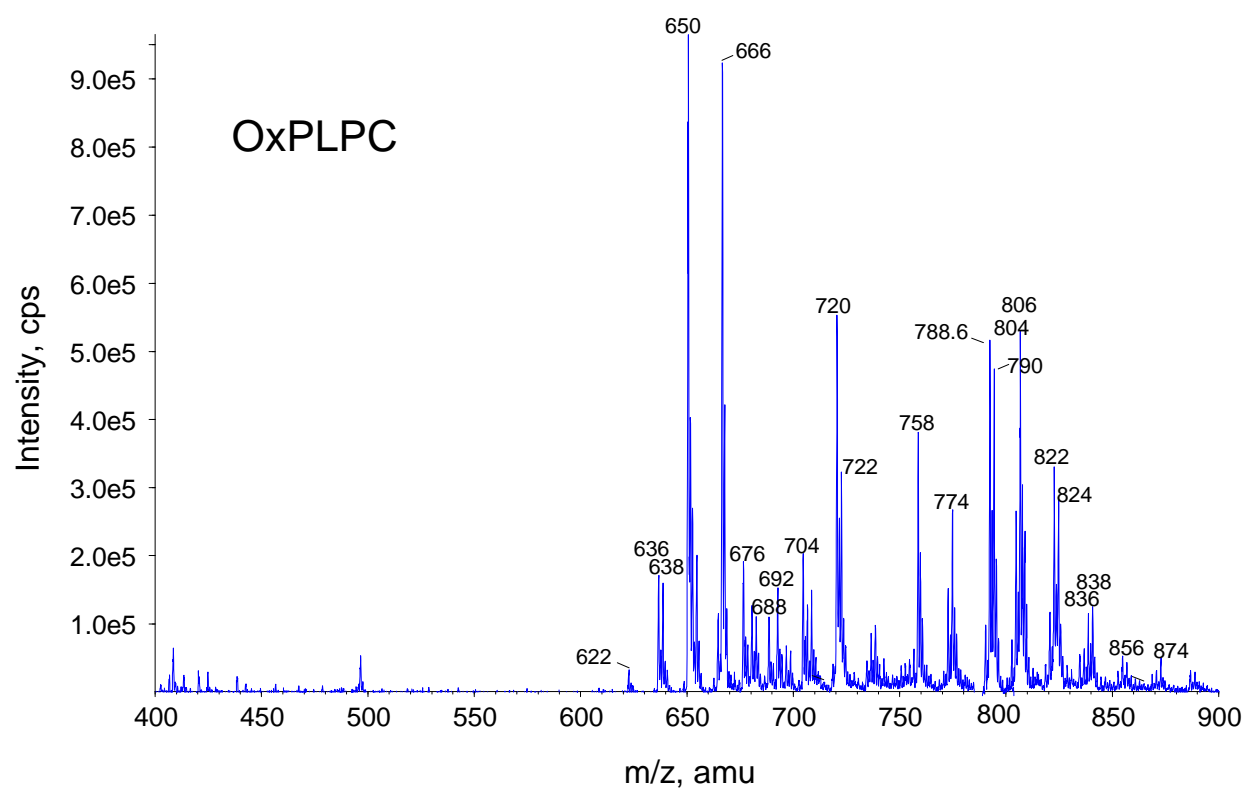

Supplementary Figure 2.

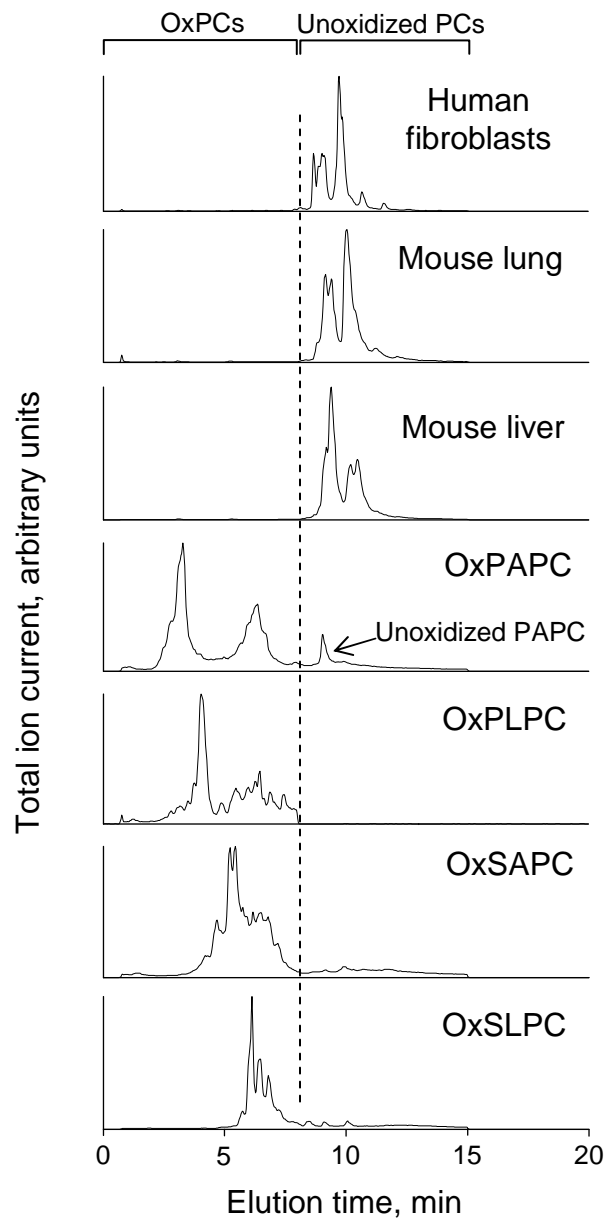

Supplementary Figure 3

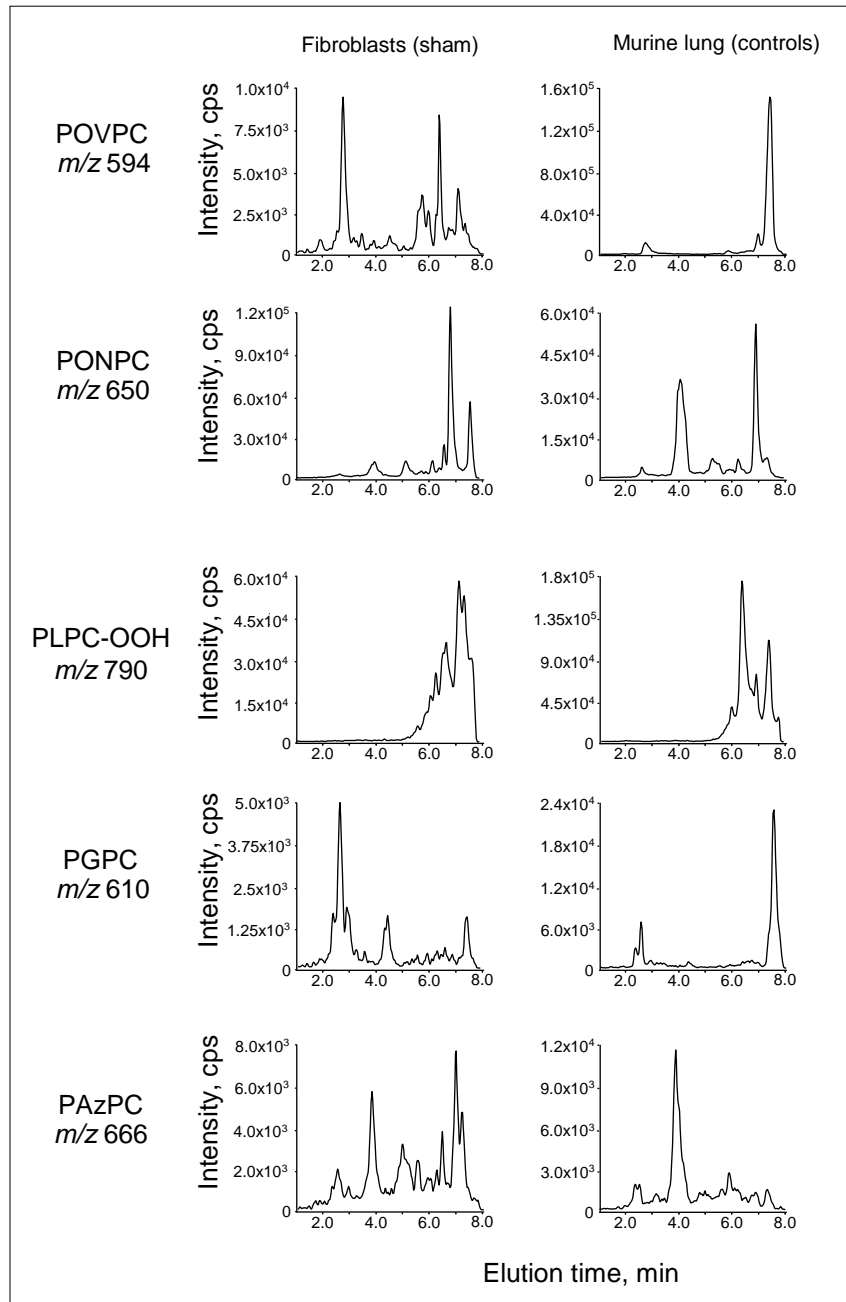

Supplementary Figure 4 (to be continued on the next page)

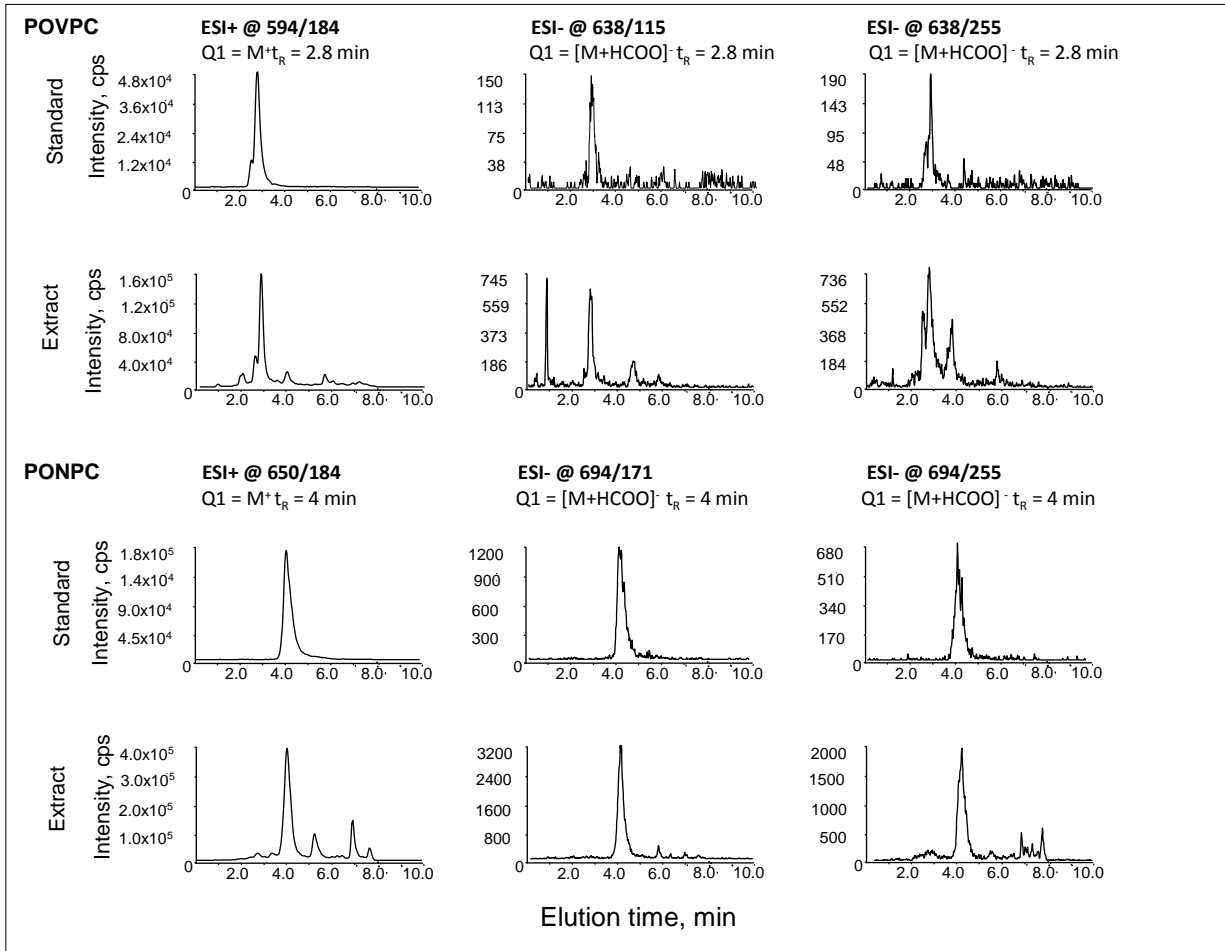

Supplementary Figure 4 (continued)

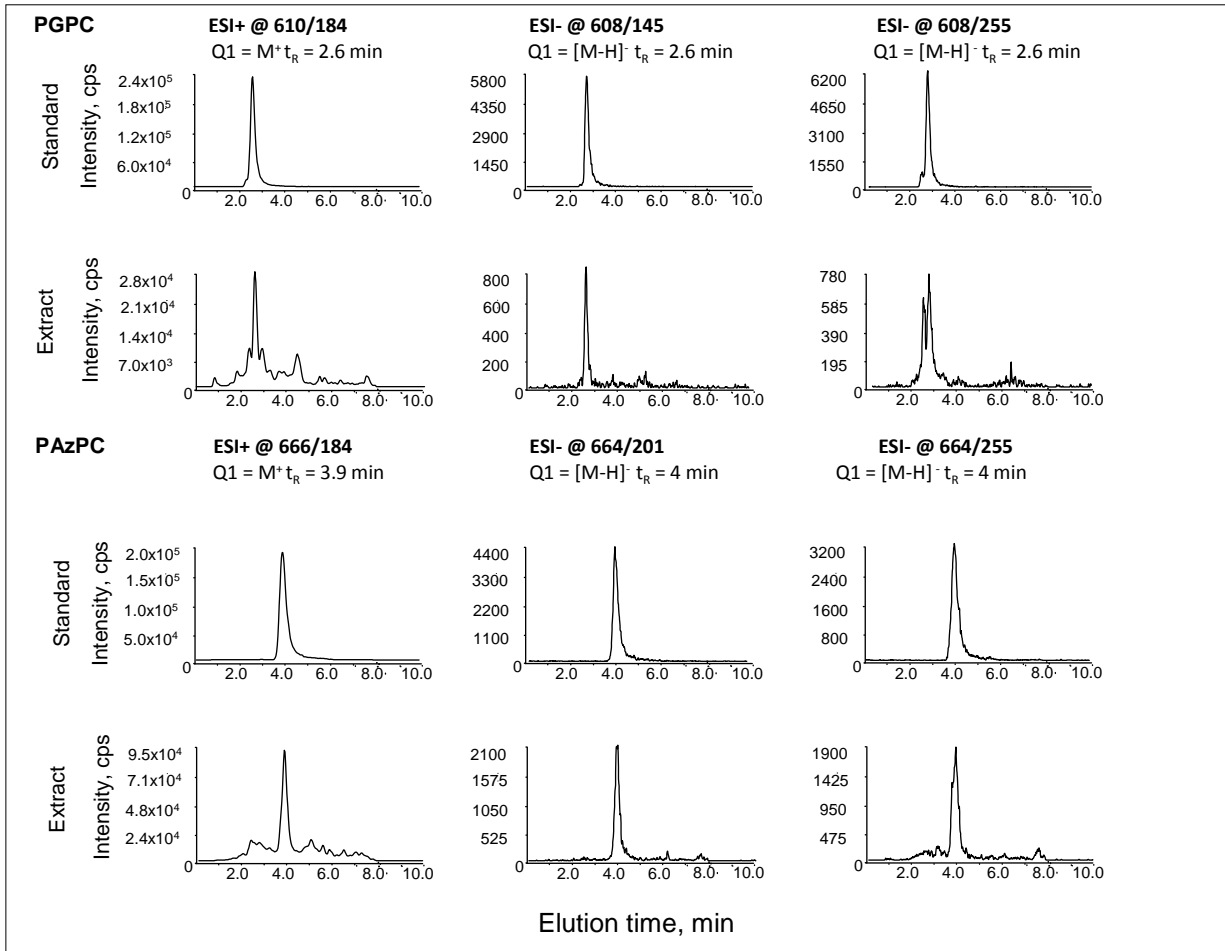

Supplement: supp_D025270_jlr.D025270-2.pdf [file supp_D025270_jlr.D025270-2.pdf]
